# Supplementary material for: Bioinformatics and Multiepitope DNA Immunization to Design Rational Snake Antivenom
Source: PLOS journal article supplement (doi:10.1371/journal.pmed.0030184), 2006-05-31
Supplement: S1 (10.1371/journal.pmed.0030184.s001) [file journal.pmed.0030184.s001]

Figure S2: Composition of the *E. ocellatus* venom gland transcriptome

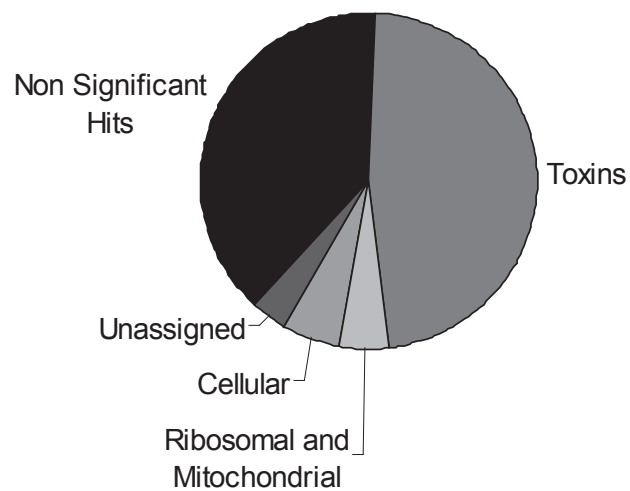

BLAST annotated composition of the *E. ocellatus* venom gland EST database. Relative composition of toxin, cellular, and ribosomal/mitochondrial transcripts are shown. Transcripts with no significant match to Uniprot and Trembl databases (non-significant hits) are also indicated. Transcripts whose potential function could be either intra or extracellular were classified as unassigned.
